# Supplementary material
Source: HighWire-hosted journal article supplement (http://www.ajnr.org/highwire/filestream/52275/field_highwire_adjunct_files/0/1233_tables.pdf)
Supplement: 1233_tables.pdf [file 1233_tables.pdf]

**On-line Table 1: Clinical and imaging findings of all 21 patients in our series**

| No. | Age  | Sex | CT                                     | T1                                        | T2/FLAIR                                     | T1C+                               | Other                                                                          | Max Di (cm) | Hemorrhage | Location                                                      | Clinical History                                |
|-----|------|-----|----------------------------------------|-------------------------------------------|----------------------------------------------|------------------------------------|--------------------------------------------------------------------------------|-------------|------------|---------------------------------------------------------------|-------------------------------------------------|
| 1   | 4 y  | F   | NCCT: hypoA surrounding blood          | Uniformly hypointense                     | Uniformly hyperintense                       | Heterogeneous with rim enhancement |                                                                                | 3           | Yes        | 4th ventricle                                                 | Seizure                                         |
| 2   | 13 y | F   |                                        | Uniformly hypointense                     | Uniformly hyperintense                       | No enhancement                     |                                                                                | 2.5         | No         | Right parietal cortex                                         | Seizure                                         |
| 3   | 11 m | M   | NCCT: hypoA                            | Isointense                                | Uniformly hyperintense                       | Uniform enhancement                | DWI: no diffusion restriction                                                  | 5           | No         | Left medial temporal lobe                                     | Seizure                                         |
| 4   | 5 y  | M   | NCCT: hypoA                            |                                           | Uniformly hyperintense                       | Uniform enhancement                |                                                                                | 2.5         | No         | Hypothalamus/optic chiasm/3rd ventricle                       | Sudden headache, visual changes                 |
| 5   | 46 y | M   | NCCT: hyperA core, hypoA rim           | Hypo-isointense                           | Hypointense core with hyperintense rim       | Rim enhancement                    | MRA (vascular tumor)                                                           | 2           | Yes        | Hypothalamus/optic chiasm                                     | Headache and vomiting                           |
| 6   | 2 y  | M   | NCCT: hypoA                            | Uniformly hypointense                     | Uniformly hyperintense                       | No enhancement                     | MRS: elevated Cho/Cr; DWI: no diffusion restriction                            | 4           | No         | Right posterior parietal cortex                               | Seizure                                         |
| 7   | 9 m  | M   |                                        | Uniformly hypointense                     | Uniformly hyperintense                       | Uniform enhancement                | MRS: elevated Cho/Cr; DWI: no diffusion restriction                            | 7           | No         | Hypothalamus/optic chiasm/3rd ventricle                       | Failure to thrive, cachexia, and vomiting       |
| 8   | 21 m | M   | NCCT: hypoA                            | Uniformly hypointense                     | Uniformly hyperintense, thin rim of edema    | Uniform enhancement                | MRS: elevated Cho/Cr; spine TIC+: spinal metastases on follow-up imaging       | 3           | No         | Hypothalamus/optic chiasm/3rd ventricle                       | Failure to thrive, vomiting, and agitation      |
| 9   | 3 y  | F   |                                        |                                           | Heterogeneous hyperintensity                 | Uniform enhancement                |                                                                                | 11          | No         | Bilateral temporal lobes                                      | Clinically blind                                |
| 10  | 20 m | M   |                                        |                                           | Uniformly hyperintense                       | Heterogeneous with rim enhancement |                                                                                | 7           | No         | Hypothalamus/optic chiasm/3rd ventricle/left temporal lobe    | Right hemiplegia                                |
| 11  | 24 y | M   | NCCT: hypoA, fluid-fluid levels        | Hypo-hyperintense with fluid-fluid levels | Hypo-hyperintense with fluid-fluid levels    | Partial rim enhancement            | GRE (hyper-intense tumor, hypointense hemorrhage) MRA (vascular tumor)         | 6           | Yes        | Right temporal lobe                                           | Confusion, vomiting, headache, gait instability |
| 12  | 9 y  | M   | NCCT: heterogeneous hyperA             | Hypo-hyperintense                         | Heterogeneous hyperintensity                 | Heterogeneous with rim enhancement | GRE: hyperintense tumor, hypointense hemorrhage; DWI: no diffusion restriction | 6           | Yes        | Hypothalamus/optic chiasm/3rd ventricle/medial temporal lobes | Visual changes                                  |
| 13  | 17 y | M   | NCCT: hypoA CECT: rim enhancement      | Uniformly hypointense                     | Heterogeneous hyperintensity                 | Rim enhancement                    | DWI: no diffusion restriction                                                  | 4.5         | No         | Cerebellar vermis                                             | Intractable headache                            |
| 14  | 3 y  | F   | CECT: rim enhancement                  | Uniformly hypointense                     | Uniformly hyperintense                       | Heterogeneous with rim enhancement | DWI: no diffusion restriction; MRS: elevated Cho/Cr                            | 5.5         | No         | Hypothalamus/optic chiasm                                     | Left facial and extremity weakness              |
| 15  | 9 m  | F   | NCCT: hypoA, rim/central calcification | Uniformly hypointense                     | Uniformly hyperintense                       | Uniform enhancement                | DWI: no diffusion restriction                                                  | 4           | No         | Hypothalamus/optic chiasm                                     | NF-1, macrocephaly                              |
| 16  | 17 y | F   | NCCT: hypoA, rim enhancement           | Uniformly hypointense                     | Uniformly hyperintense                       | Rim enhancement                    | DWI: no diffusion restriction                                                  | 4           | No         | Basal ganglia                                                 | Headache                                        |
| 17  | 13 y | F   |                                        | Uniformly hypointense                     | Uniformly hyperintense, thin rim of edema    | Rim enhancement                    | DWI: no diffusion restriction                                                  | 3.5         | No         | Cerebellum                                                    | Headache                                        |
| 18  | 9 y  | F   | NCCT: hypoA                            | Isointense                                | Uniformly hyperintense                       | Uniform enhancement                | DWI: no diffusion restriction; MRS: elevated Cho/Cr                            | 2           | No         | 3rd ventricle                                                 | Vomiting, ophthalmoplegia                       |
| 19  | 9 y  | F   | NCCT: hypoA                            | Uniformly hypointense                     | Uniformly hyperintense                       | Heterogeneous with rim enhancement | DWI: no diffusion restriction; MRS: elevated Cho/Cr                            | 3.5         | No         | Hypothalamus/optic chiasm                                     | NF-1, headache, vomiting                        |
| 20  | 21 y | M   | NCCT: hypoA                            | Uniformly hypointense                     | Hypointense core, hyperintense rim           | Heterogeneous with rim enhancement | MRS: elevated Cho/Cr                                                           | 2.5         | Yes        | Hypothalamus/optic chiasm                                     | Headache                                        |
| 21  | 14 m | M   |                                        | Uniformly hypointense                     | Uniformly hyperintense, small adjacent edema | Uniform enhancement                |                                                                                | 2.5         | No         | Thalamus                                                      | Right hemiplegia                                |

**Note:**—T1C+ indicates contrast-enhanced T1WI; Max Di, maximum diameter; hypo A, hypointensuating; hyperA, hyperattenuating; MRA, MR angiography; MRS, MR spectroscopy; DWI, diffusion-weighted imaging; Cho, choline; Cr, creatine; GRE, gradient recalled-echo; CECT, contrast-enhanced CT; NCCT, noncontrast-enhanced CT; NF-1, neurofibromatosis type 1.

**On-line Table 2: Clinical and imaging findings of previously reported cases of PMA\***

| Age  | Sex | T1C+                                                               | Hemorrhage | Location                                                                      | Clinical History                                    | Ref # |
|------|-----|--------------------------------------------------------------------|------------|-------------------------------------------------------------------------------|-----------------------------------------------------|-------|
| 30 m | F   | Enhancing, partially cystic                                        | No         | Hypothalamic/optic chiasm                                                     | Headache, vomiting, unsteady gait                   | 32    |
| 3 yr | M   | Uniform enhancement                                                | No         | Hypothalamic/optic chiasm                                                     | Diplopia, decreased left eye movement and vision    | 32    |
| 22 y | F   | Anterior partial enhancement                                       | No         | Hypothalamic/optic chiasm                                                     | GOPO with galactorrhea, elevated prolactin          | 32    |
| 2y   | M   | Uniform with thick peripheral enhancement                          | No         | Hypothalamic/optic chiasm                                                     | Failure to thrive                                   | 5     |
| 5 m  | M   | Uniform enhancement                                                | No         | Hypothalamic/optic chiasm                                                     | Feeding difficulties                                | 5     |
| 2 y  | F   | Uniform enhancement                                                | No         | Hypothalamic/optic chiasm                                                     | Failure to thrive                                   | 5     |
| 10 m | M   | Uniform enhancement                                                | No         | Hypothalamic/optic chiasm                                                     | Developmental delay                                 | 5     |
| 16 m | F   | Heterogeneous rim enhancement with cystic change                   | No         | Hypothalamic/optic chiasm with leptomeningeal spinal metastases               | Failure to thrive                                   | 33    |
| 6 y  | M   | Uniform enhancement                                                | No         | Spinal cord (thoracic, medulla)                                               | Nocturnal back pain and constipation                | 14    |
| 8 y  | M   |                                                                    | No         | Spinal cord (thoracic)                                                        | Back pain                                           | 14    |
| 1 m  | M   |                                                                    | No         | Spinal cord (diffuse)                                                         | Failure to thrive, hypotonia                        | 14    |
| 10 m | M   | Heterogeneous enhancement                                          | No         | Hypothalamic/optic chiasm                                                     | Nausea/vomiting, eye twitching                      | 30    |
| 4 y  | F   | Heterogeneous rim enhancement                                      | No         | Hypothalamic/optic chiasm                                                     | Decreased visual acuity, left proptosis/ptosis      | 30    |
| 9 y  | F   | Thick rim enhancement                                              | No         | Hypothalamic/optic chiasm                                                     | Headache, vomiting, weight loss                     | 9     |
| 28 y | M   | Enhancing nodule with surrounding hypointensity                    | No         | Amygdala                                                                      | Seizures                                            | 13    |
| 33 y | M   | Uniform enhancement                                                | Yes        | Right ventricular horn, cervical leptomeningeal metastases                    | Headache, nausea, diplopia, disorientation          | 35    |
| 11 m | M   | Heterogeneous enhancement                                          | No         | Hypothalamus/optic chiasm                                                     | Failure to thrive                                   | 36    |
| 4 m  | M   | Heterogeneous, rim enhancement                                     | No         | Hypothalamus/optic chiasm with extension into both hemispheres and ventricles | Feeding difficulties, vomiting, irritability        | 37    |
| 6 m  | M   | Heterogeneous, thick rim enhancement with mild central enhancement | No         | Hypothalamus/optic chiasm                                                     | Failure to thrive                                   | 16    |
| 7 m  | F   | Uniform enhancement                                                | No         | Hypothalamus/optic chiasm                                                     | Failure to thrive, dysconjugate gaze, and nystagmus | 16    |
| 8 m  | F   | Thick rim enhancement                                              | Yes        | Thalamus                                                                      | Hemiparesis, facial asymmetry                       | 16    |
| 3 m  | M   | No enhancement                                                     | No         | Basal ganglia, extending into L frontal lobe and lateral ventricle            | Bulging fontanelle, irritability                    | 16    |
| 6 m  | F   | Uniform enhancement                                                | No         | Hypothalamic/optic chiasm, with extension into right basal ganglia            | Failure to thrive, abnormal eye movements           | 15    |
| 29 y | F   | Uniform enhancement                                                | No         | Spinal cord                                                                   | Progressive neck and back pain                      | 6     |
| 5 y  | M   | Rim enhancement                                                    | Yes        | Hypothalamus/optic chiasm                                                     | Sudden headache and vomiting                        | 38    |

**Note:**—T1C+ indicates contrast-enhanced T1WI; GOPO, Gravidá0 Para0.

\* Cases are chronologically ordered from top to bottom, oldest to most recent. Previously reported PMAs with no associated published imaging findings were excluded from this table.
